# Supplementary material for: Strong Genetic Overlaps Between Dimensional and Categorical Models of Bipolar Disorders in a Family Sample
Source: bioRxiv or medRxiv preprint supplement (doi:10.1101/2023.06.24.23291169), 2024-03-26
Supplement: Supplementary file [file media-1.pdf]

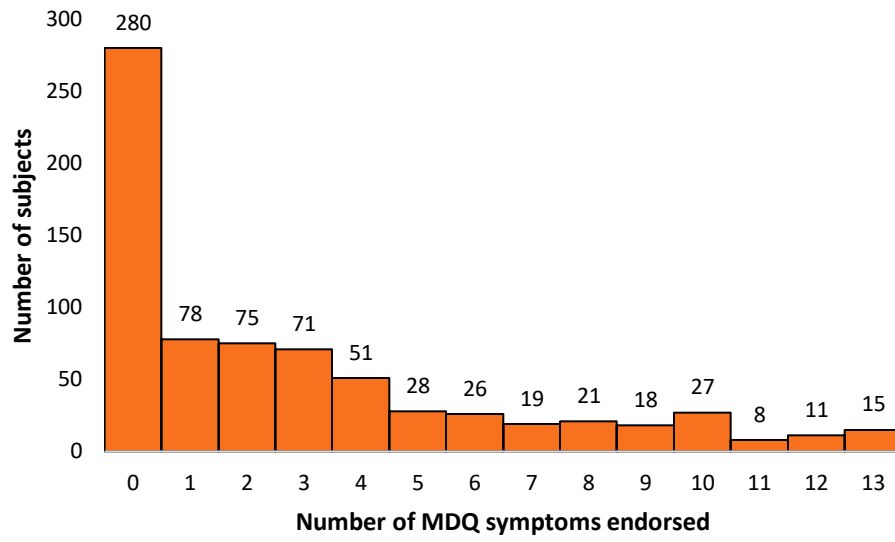

**Figure S1.** Bar plot showing the distribution of Mood Disorder Questionnaire (MDQ) scores for the whole sample ( $n = 726$ )

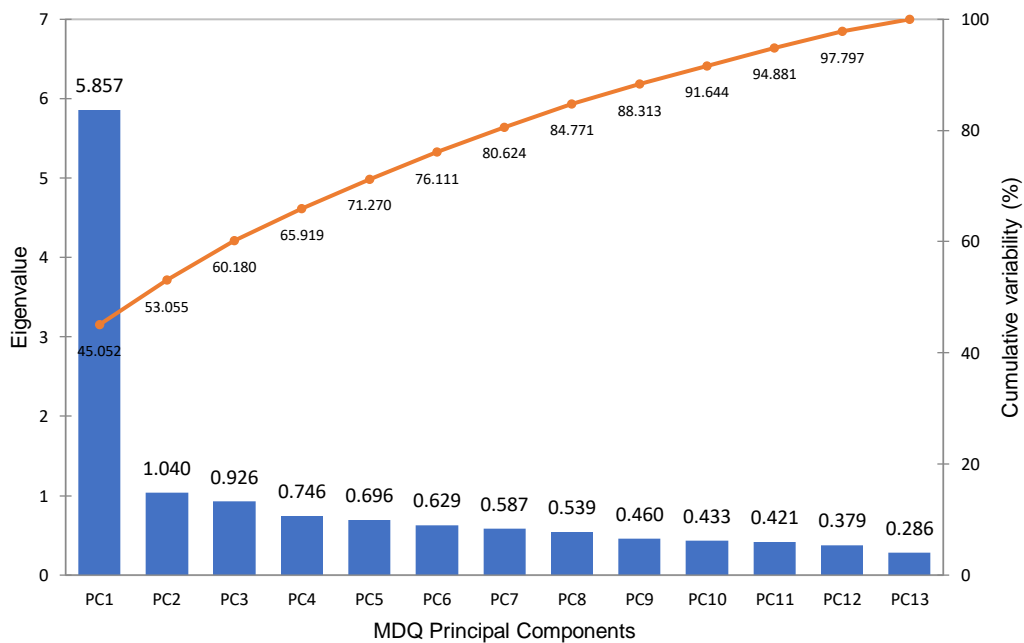

**Figure S2.** Plot of the eigenvalues based on the data from the Principal Component Analysis. Eigenvalues are shown as bar plots in blue. Cumulative variability % is shown as a red line. PC = principal component
